# Supplementary material
Source: PubMed Central journal article supplement (PMC8851096)
Supplement: mmc1.pdf [file mmc1.pdf]

**iScience, Volume 25**

**Supplemental information**

**CRISPR-Cas3-based diagnostics  
for SARS-CoV-2 and influenza virus**

**Kazuto Yoshimi, Kohei Takeshita, Seiya Yamayoshi, Satomi Shibumura, Yuko Yamauchi, Masaki Yamamoto, Hiroshi Yotsuyanagi, Yoshihiro Kawaoka, and Tomoji Mashimo**

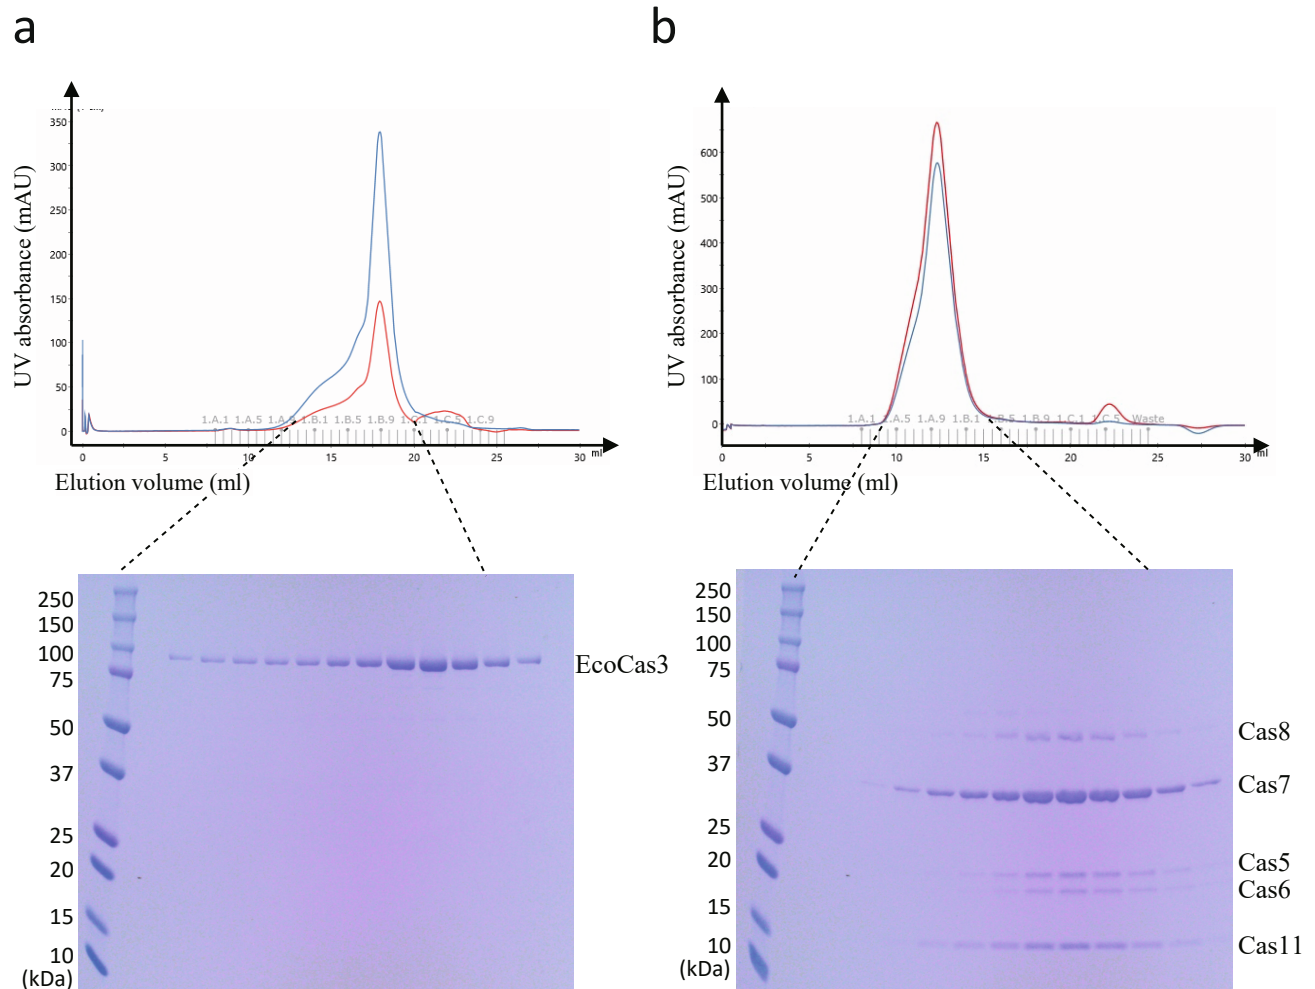

**Fig. S1. Size-exclusion chromatography and SDS-PAGE for EcoCas3 and EcoCascade (Cas5, Cas6, Cas7, Cas8 and Cas11) ribonucleoproteins. Related to STAR Methods.** (a) A massive amount of EcoCas3 protein was expressed using the baculovirus expression system in Sf9 insect cells cultured at 20 degree. Purified EcoCas3 protein was soluble, and ~95 % homogeneous in SDS-PAGE. (b) A complex of Cas5, Cas6, Cas7, Cas8 and Cas11 proteins and crRNA was co-expressed in JM109(DE3) *E.coli* cultured at 26 degree.

### Non-specific ssDNA cleavage activity

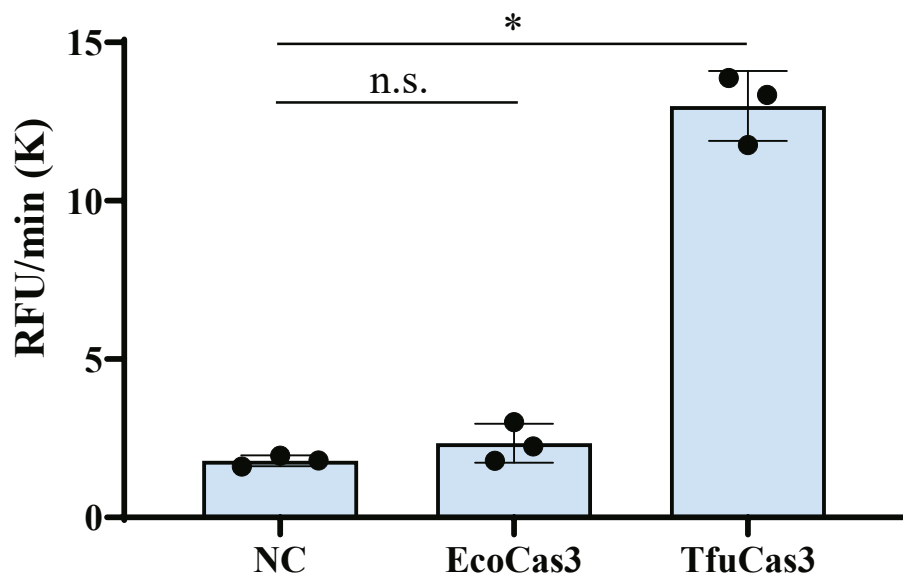

**Fig. S2. Non-specific ssDNA cleavage activity by Cas3 proteins. Related to STAR Methods.** Incubating Cas3 derived from *T. fusca* (TfuCas3) with FQ-ssDNA probes resulted in non-specific ssDNA cleavage activity, but no activity by that derived from *E. coli* (EcoCas3). RFU/min: increasing rate of relative fluorescence units/min. NC: negative control. Means (n=3) and standard deviations. \*:p<0.001 n.s.: not significant.

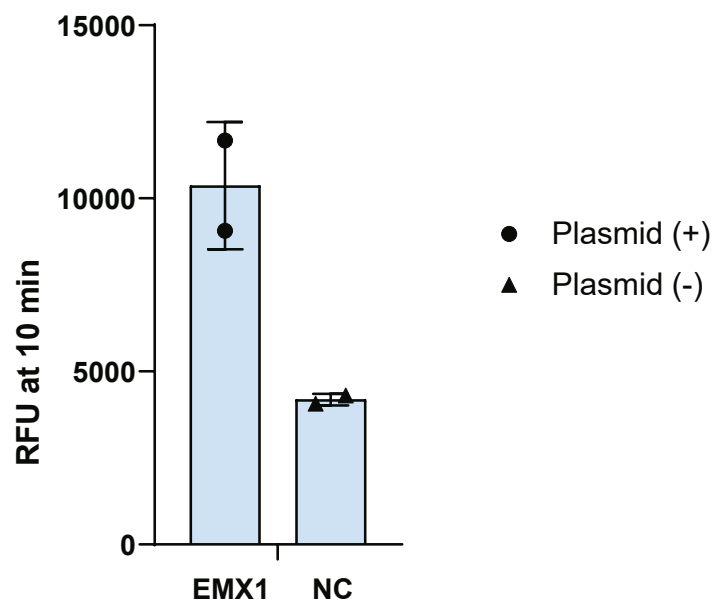

**Fig. S3. Collateral cleavage activity by CONAN. Related to Fig. 1b.** The 3-Kb dsDNA plasmid (+), which includes the target *hEMX1* sequence and the EcoCas3/EcoCascade-crRNA, activates *trans* cleavage of the FQ-ssDNA probe. NC: negative control (plasmid (-)). RFU: relative fluorescence units at 10 min post-incubation. Means (n=2) and standard deviations.

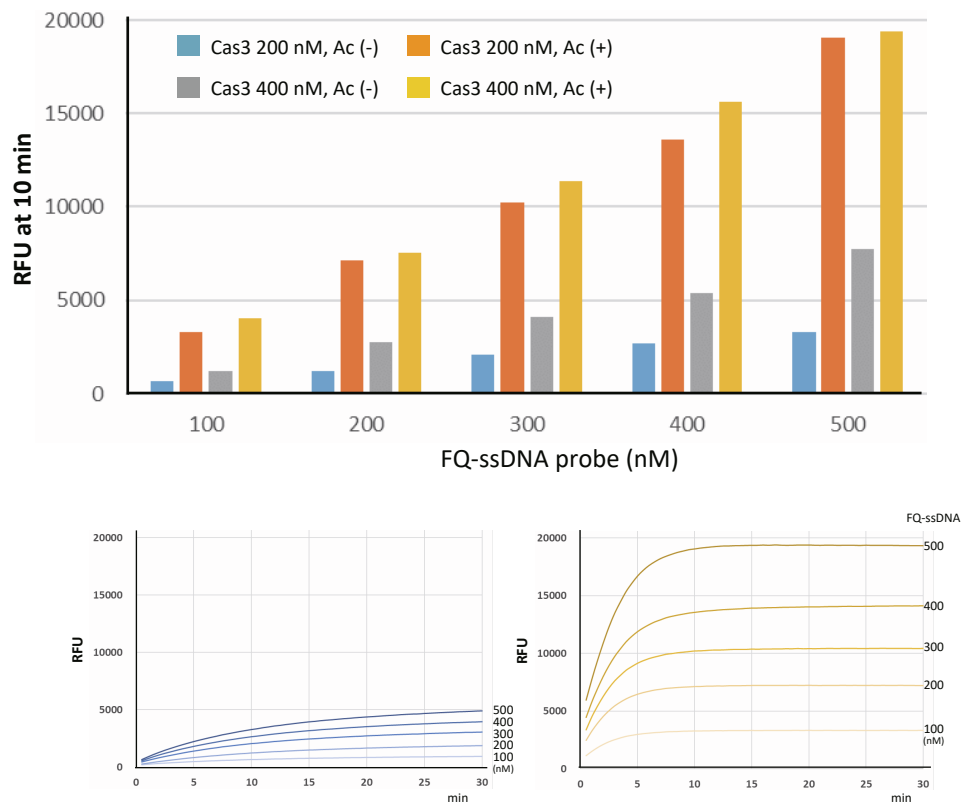

**Fig. S4. Collateral cleavage activity by CONAN. Related to Fig. 1b.**

The concentration of the FQ-ssDNA probe (nM) correlated with the signal intensity (RFU), suggesting that Cas3 cleaves several copies of ssDNA per bound Cascade. EcoCas3 (200 or 400 nM), EcoCascade-crRNA complex (200 nM), 60-bp ddsDNA activator for EMX1 (Ac), and FQ-labeled ssDNA probe were in the reaction buffer. RFU: relative fluorescence unit.

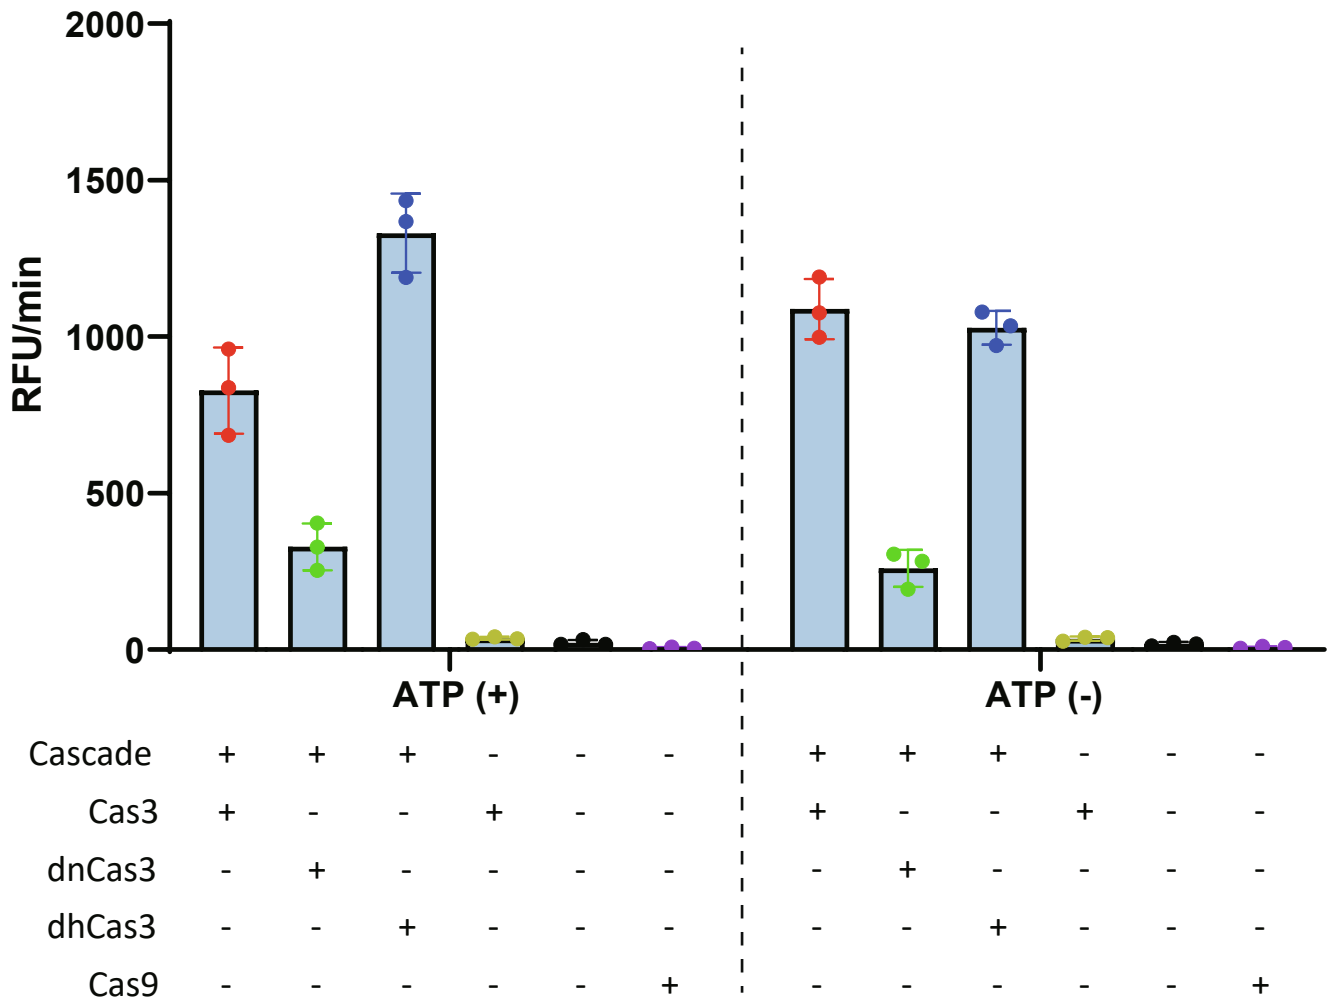

**Fig. S5. Collateral cleavage activity by CONAN. Related to Fig. 1b.** EcoCas3 HD domain H74A (dead nuclease mutant, dnCas3), abolished collateral cleavage activity, while SF2 motif III S483A/T485A (dead helicase mutant, dhCas3) showed collateral cleavage activity. Collateral activity in ATP reaction buffer (+) was at the same level as that in ATP-free buffer (-) for wild-type EcoCas3 and the dhCas3 mutant. SpCas9 did not exhibit any collateral cleavage activity.

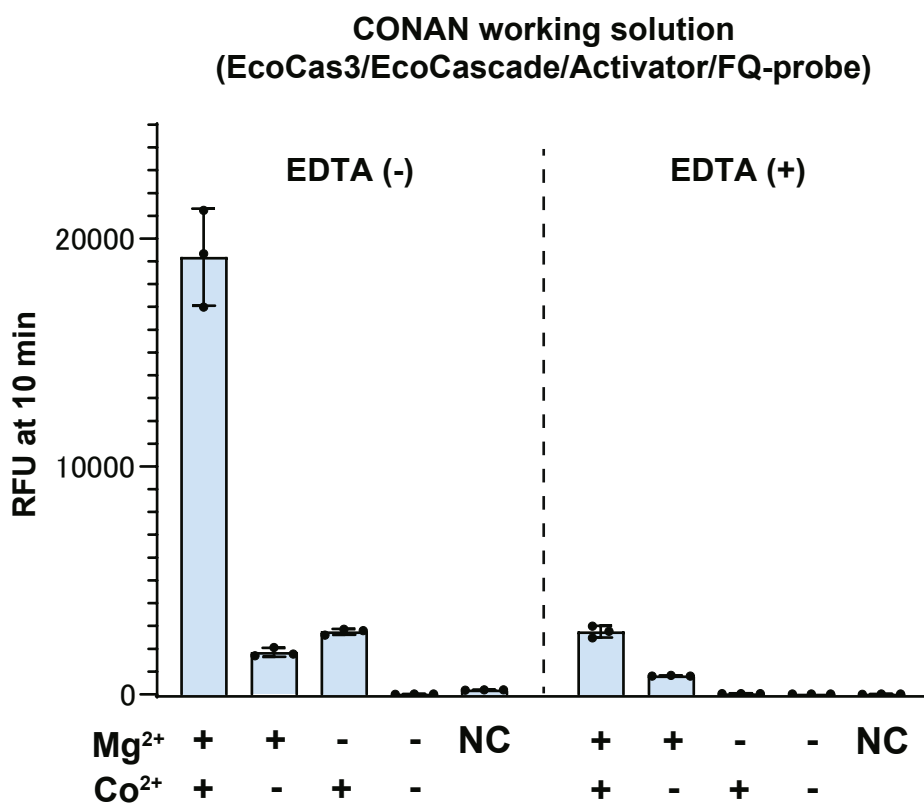

**Fig. S6. Collateral cleavage activity by CONAN. Related to Fig. 1b.**

Absence of Mg<sup>2+</sup> and Co<sup>2+</sup> in the reaction buffer weakened the *trans*-ssDNA cleavage activity. Presence of a divalent ion chelating agent, EDTA (+), abolished the collateral cleavage activity. RFU: relative fluorescence unit. Means (n=3) and standard deviations.

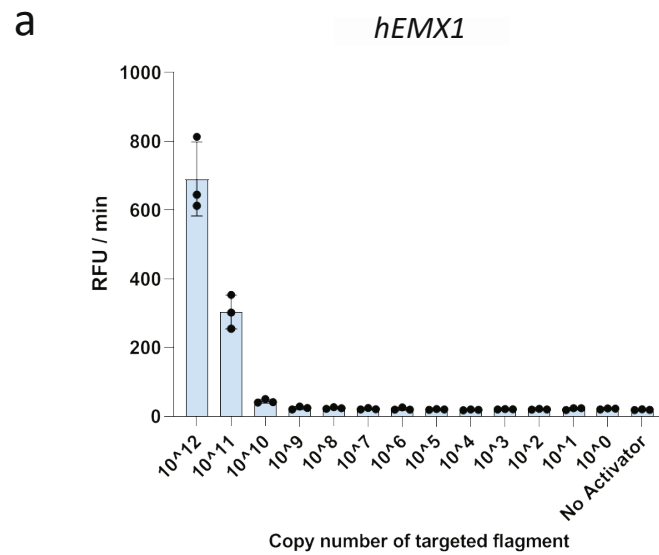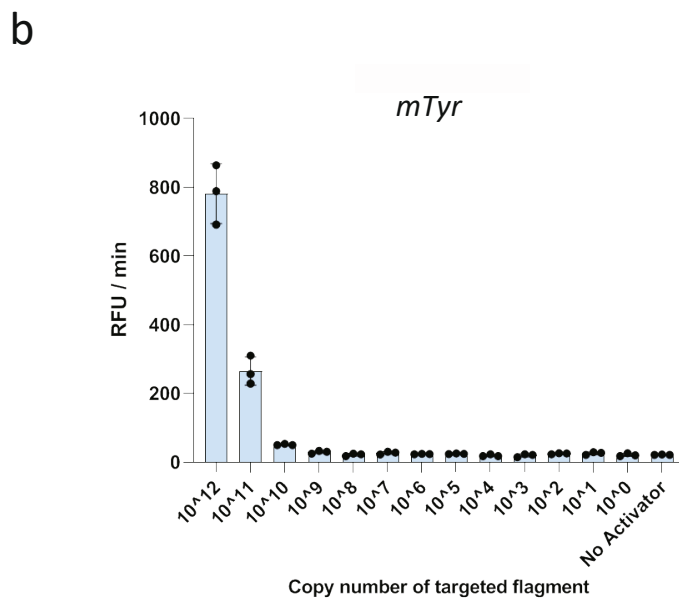

**Fig. S7. Limit of detection (LoD) of the CONAN assay. Related to Fig. 1c.** Dilution of the dsDNA activator *hEMX1* (a) or mouse genome dsDNA *mTyr* (b) with Cas3, Cascade, and FQ-ssDNA in the reaction buffer. RFU/min: increasing rate of relative fluorescence unit/min. Means (n=3) and standard deviations.



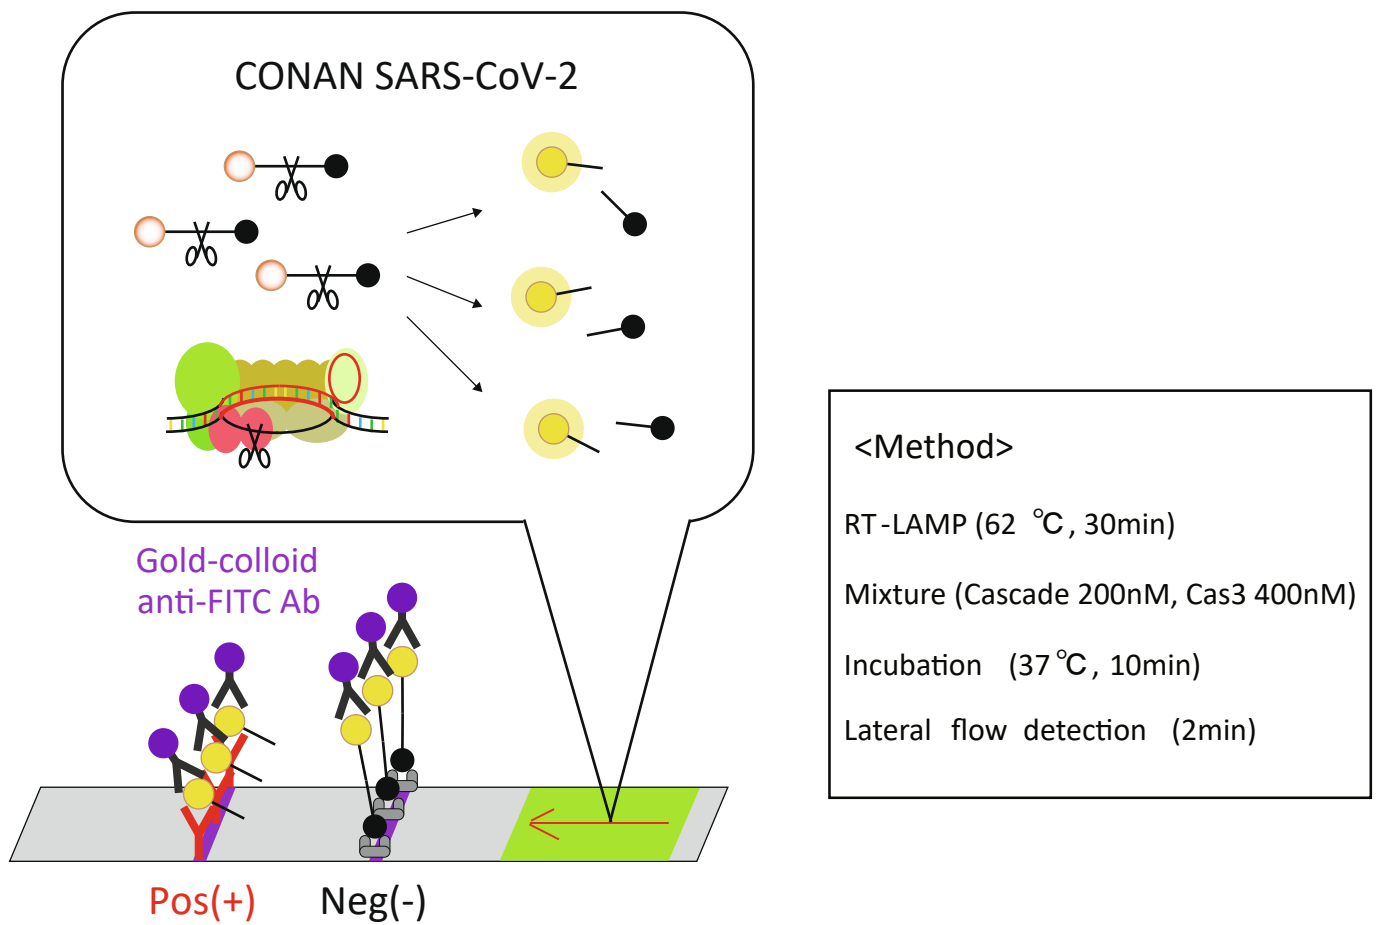

**Fig. S8. Lateral-flow detection with CONAN. Related to Fig. 2d and STAR Methods.** Abundant uncleaved FQ-labeled ssDNA reporter accumulates anti-FAM antibody-gold nanoparticle conjugates at the first line (negative) on the strip, while cleaved reporter reduce accumulation at the first line and result in signal on the second line (positive) for <2 min flow.

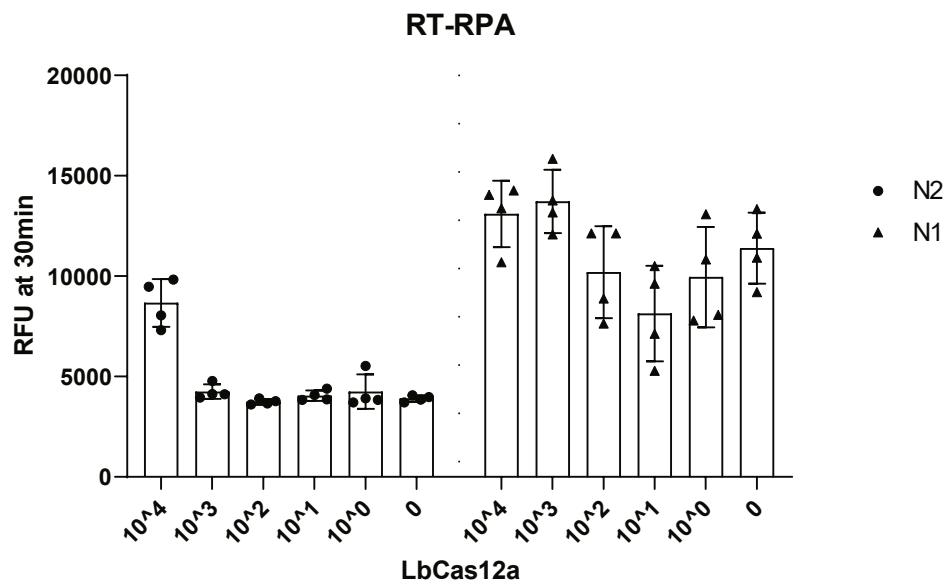

**Fig. S9. Limit of detection (LoD) of the Cas12a-based DETECTR RT-RPA assay using N1 and N2 primers designed for the N gene region of SARS-CoV-2. Related to Fig. 2b and Table S1.** RT-RPA followed by Cas12a-based DETECTR in the one-step 37°C 30-min incubation did not effectively detect SARS-CoV-2. RFU: relative fluorescence at 30 min. Means (n=3) and standard deviations.

| Sample name       | Ct value<br>(5 $\mu$ L sample) | Estimated Copy<br>number<br>( $\mu$ L) | Image of a lateral flow assay |     | CONAN detection<br>(Gray depth) |        | Result |                            |
|-------------------|--------------------------------|----------------------------------------|-------------------------------|-----|---------------------------------|--------|--------|----------------------------|
|                   |                                |                                        | 1st                           | 2nd | 1st                             | 2nd    |        |                            |
| NP- (N1)          | -                              | -                                      |                               |     | 11.1                            | - 12.8 | -      | Negative Control           |
| NP- (N2)          | -                              | -                                      |                               |     | 10.2                            | - 7.0  | -      | Negative Control           |
| NPCo-015NT1 (P1)  | 24.51                          | 13688                                  |                               |     | 27.0                            | + 19.7 | -      | Positive<br>(Intermediate) |
| NPCo-016NT1 (P2)  | 23.31                          | 31522                                  |                               |     | 63.3                            | + 78.7 | +      | Positive                   |
| NPCo-018NT1 (P3)  | 28.56                          | 820                                    |                               |     | 18.7                            | - 73.5 | +      | Positive<br>(Intermediate) |
| NPCo-021NT1 (P4)  | 34.64                          | 12                                     |                               |     | 11.0                            | - 12.3 | -      | Negative                   |
| NPCo-021NT2 (P5)  | 33.64                          | 24                                     |                               |     | 75.7                            | + 27.0 | +      | Positive                   |
| NPCo-022NT1 (P6)  | 30.49                          | 214                                    |                               |     | 8.3                             | - 77.2 | +      | Positive<br>(Intermediate) |
| NPCo-023NT1 (P7)  | 34.73                          | 11                                     |                               |     | 65.3                            | + 19.3 | -      | Positive<br>(Intermediate) |
| NPCo-025NT1 (P8)  | 28.60                          | 797                                    |                               |     | 62.7                            | + 71.2 | +      | Positive                   |
| NPCo-025NT2 (P9)  | 26.91                          | 2581                                   |                               |     | 74.4                            | + 22.0 | +      | Positive                   |
| NPCo-026NT1 (P10) | 25.37                          | 7529                                   |                               |     | 69.0                            | + 64.8 | +      | Positive                   |

Cont Test Cont Test

**Fig. S10. SARS-CoV-2 CONAN lateral flow assay results for 10 PCR-positive samples. Related to Fig. 2e.** We tested the extracted RNA samples from 10 PCR-positive patients with COVID-19 (P1–10) and PCR-negative samples (N1-2) from nasopharyngeal swabs using CONAN RT-LAMP with lateral flow strip readouts. In CONAN detection, the gray depth of the second test line (blue) is measured after 2 min of flow.

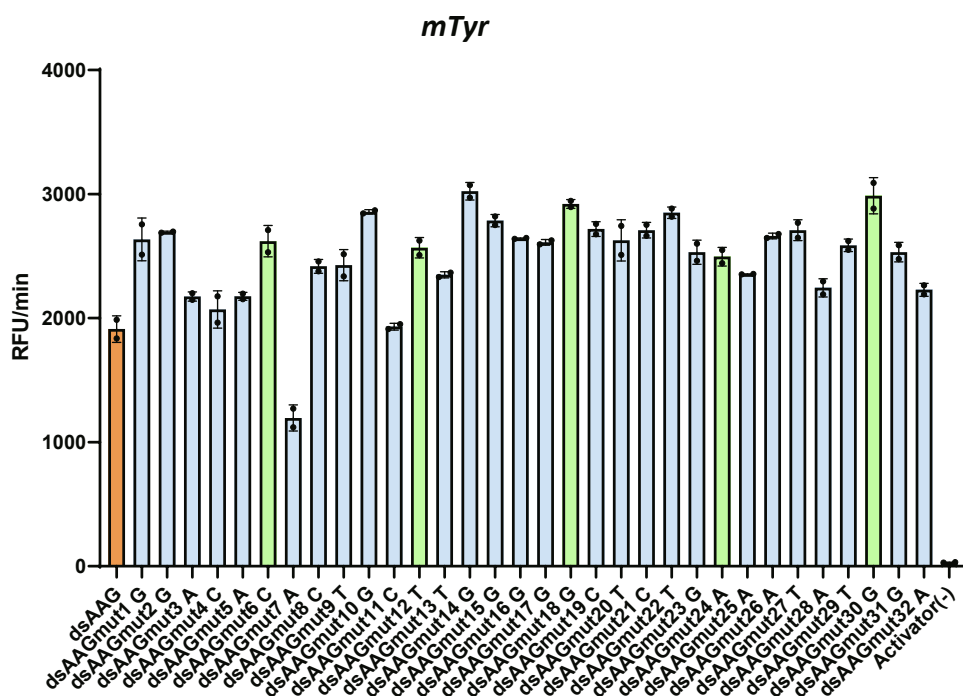

**Fig. S11.** The effect of mismatch of each 32-nt spacer sequence on collateral cleavage activity. Related to Fig. 2f, g and Table S4. A single mismatch in the spacer region has a little or no effect on collateral cleavage activity of *mTyr* target.

**Table S1. Target sequences used for the trans cleavage assay. Related to Fig. 1, 2, S9, and STAR Methods.**

| Name                 | PAM (5' to 3') | Sequence (5' to 3')                   |
|----------------------|----------------|---------------------------------------|
| <b>CRISPR-Cas3</b>   |                |                                       |
| hEMX1                |                | AAG CAGGCCAATGGGGAGGACATCGATGTCACCTC  |
| mTyr                 |                | AAG GGACACACTGCTTGGGGGCTCTGAAATATGGA  |
| SARS-N1              |                | AAG GCCAAACTGTCACTAAGAAATCTGCTGCTGAG  |
| SARS-N2              |                | AAG GAACTGATTACAAACATTGGCCGCAAATTGCA  |
| IAV-H1N1-I38         |                | AAT TGCAGCAAACCTTATTAGTTTCAATTTTGGGGT |
| IAV-H3N2-I38         |                | ATA TGCACTCACTTGGAGGTGTGTTTCATGTATTC  |
| IAV-H1N1-I222-Mu     |                | TAG ATTGAGAACACAAGAGTCTGAATGTGCATGTG  |
| IAV-H1N1-H274-Mu     |                | TAA TAATTAGGGGCTTTCATTTCCGACTGATTTGAT |
| IAV-H3N2-N294-Mu     |                | CAG CTGTCTCTGCAGACACATCTGACACCAGGATA  |
| <b>CRISPR-Cas12a</b> |                |                                       |
| hEMX1                |                | TTTG TGGTTGCCACCCTAGTCATT             |
| SARS-N1              |                | TTTC TTAGTGACAGTTTGGCCTTG             |
| SARS-N2              |                | TTTG CCCCAGCGCTTCAGCGTTC              |

**Table S2. DNA fragment sequences used for CONAN. Related to Fig. 1, 2, and STAR Methods.**

| Name               | Sequence (5' to 3')                                                                 |
|--------------------|-------------------------------------------------------------------------------------|
| EMX1-AAG           | TGGCGCATTGCCACGAAGCAGGCCAATGGGGAGGACATCGATGTCACCTCCAATGACTAG                        |
| mTyr-AAG           | GCATTACTATGTGTCAAGGGACACACTGCTTGGGGGCTCTGAAATATGGAGGGACATTGA                        |
| H1N1pdm09-PA-I38   | GGGAAGACCCCAAAATTGAAACTAATAAGTTTGCTGCAATTTGCACACATTTGGAAGTTTGTTCATGTATTCCGATTTTC    |
| H1N1pdm09-PA-I38T  | GGGAAGACCCCAAAATTGAAACTAATAAGTTTGCTGCAACTTGCACACATTTGGAAGTTTGTTCATGTATTCCGATTTTC    |
| H1N1pdm09-NA-I222  | GGCATAATAACAGACACTATCAAGAGTTGGAGGAACAATATATTGAGAACACAAGAGTCTGAATGTGCATGTGTAAATGG    |
| H1N1pdm09-NA-I222R | GGCATAATAACAGACACTATCAAGAGTTGGAGGAACAATAGATTGAGAACACAAGAGTCTGAATGTGCATGTGTAAATGG    |
| H1N1pdm09-NA-H274  | AAAGATAATCAAATCAGTCGAAATGAAAGCCCCTAATTACTACTATGAGGAATGCTCCTGTTACCCTGATTCTAGTGAAA    |
| H1N1pdm09-NA-H274Y | AAAGATAATCAAATCAGTCGAAATGAAAGCCCCTAATTACTACTATGAGGAATGCTCCTGTTACCCTGATTCTAGTGAAA    |
| H3N2-PA-I38        | GGGGAGGATCTGAAAATTGAAACCAACAAATTTGCAGCAATATGCACTCACTTGGAGGTGTGTTTCATGTATTCAGATTT    |
| H3N2-PA-I38T       | GGGGAGGATCTGAAAATTGAAACCAACAAATTTGCAGCAACATGCACTCACTTGGAGGTGTGTTTCATGTATTCAGATTT    |
| H3N2-NA-N294       | TATCCTCGATATCCTGGTGTGTCAGATGTGTCTGCAGAGACAACCTGGAAAGGATCCAACCGGCCCATCATAGATATAAACAT |
| H3N2-NA-N294S      | TATCCTCGATATCCTGGTGTGTCAGATGTGTCTGCAGAGACAGCTGGAAAGGATCCAACCGGCCCATCATAGATATAAACAT  |

**Table S3. Primer sequences used for isothermal PCR. Related to Fig. 1, 2, and STAR Methods.**

| Name               | Sequence (5' to 3')                          |
|--------------------|----------------------------------------------|
| for qRT-PCR        |                                              |
| SARS-N1-qPCR-F     | GACCCCAAATCAGCGAAAT                          |
| SARS-N1-qPCR-R     | TCTGGTTACTGCCAGTTGAATCTG                     |
| SARS-N1-qPCR-probe | ACCCCGCATTACGTTTGGTGGACC                     |
| SARS-N2-qPCR-F     | TTACAAACATTGGCCGCAA                          |
| SARS-N2-qPCR-R     | GCGCGACATTCCGAAGAA                           |
| SARS-N2-qPCR-probe | ACAATTTGCCCCAGCGCTTCAG                       |
| for RPA            |                                              |
| EMX1-F             | GAAGAAGGGCTCCCATCACATCAACCGGTG               |
| EMX1-R             | GCCAGCAGCAAGCAGCACTCTGCCCTCGTG               |
| SARS-N1-F          | CTTGCTTTGCTGCTGCTTGACAGATTGAAC               |
| SARS-N1-R          | TTGTTCTGGACCACGTCTGCCGAAAGCTTG               |
| SARS-N2-F          | TTCGGCAGACGTGGTCCAGAACAAACCCAA               |
| SARS-N2-R          | CCTGTGTAGGTCAACCACGTTCCCGAAGGT               |
| for RT-LAMP        |                                              |
| <SARS-N1 set>      |                                              |
| SARS-N1-FIP        | GGTTCAATCTGTCAAGCAGCAGTAGAATGGCTGGCAATGG     |
| SARS-N1-BIP        | AAGAAGCCTCGGCAAAAACGGTTTGTCTGGACCACGT        |
| SARS-N1-F3         | AGTAGGGGAACCTTCTCCTG                         |
| SARS-N1-B3         | GTCCCAAATTTTCCTTGG                           |
| SARS-N1-LF         | AGCAAGAGCAGCATCACCG                          |
| SARS-N1-LB         | CTGCCACTAAAGCATAACAATGTAAC                   |
| <SARS-N2 set>      |                                              |
| SARS-N2-FIP        | TCTGATTAGTTCCTGGTCCCAAAGCATAACAATGTAACACAAGC |
| SARS-N2-BIP        | CGCATTGGCATGGAAGTCACTTTGATGGCACCTGTGTAG      |
| SARS-N2-F3         | GCAAAAACGTACTGCCAC                           |
| SARS-N2-B3         | GAAATTTGGATCTTTGTCATCC                       |
| SARS-N2-LF         | TGGACCACGTCTGCCGA                            |
| SARS-N2-LB         | ACCTTCGGGAACGTGGTT                           |

**Table S4. Sequences of donor DNAs. Related to Fig. 2f, g, and S11.**

| Name               | Sequence of homology arms (5' to 3')                                   |
|--------------------|------------------------------------------------------------------------|
| mTyr-AAG-60b       | GCATTACTATGTGTC <b>AAG</b> GGACACACTGCTTGGGGGCTCTGAAATATGGAGGGACATTGA  |
| mTyr-AAG-Mut1-60b  | GCATTACTATGTGTC <b>AAG</b> TGACACACTGCTTGGGGGCTCTGAAATATGGAGGGACATTGA  |
| mTyr-AAG-Mut2-60b  | GCATTACTATGTGTC <b>AAGG</b> TACACACTGCTTGGGGGCTCTGAAATATGGAGGGACATTGA  |
| mTyr-AAG-Mut3-60b  | GCATTACTATGTGTC <b>AAGGG</b> CACACTGCTTGGGGGCTCTGAAATATGGAGGGACATTGA   |
| mTyr-AAG-Mut4-60b  | GCATTACTATGTGTC <b>AAGGGA</b> AACACTGCTTGGGGGCTCTGAAATATGGAGGGACATTGA  |
| mTyr-AAG-Mut5-60b  | GCATTACTATGTGTC <b>AAGGGAC</b> CCACTGCTTGGGGGCTCTGAAATATGGAGGGACATTGA  |
| mTyr-AAG-Mut6-60b  | GCATTACTATGTGTC <b>AAGGGACA</b> AACTGCTTGGGGGCTCTGAAATATGGAGGGACATTGA  |
| mTyr-AAG-Mut7-60b  | GCATTACTATGTGTC <b>AAGGGACAC</b> CCCTGCTTGGGGGCTCTGAAATATGGAGGGACATTGA |
| mTyr-AAG-Mut8-60b  | GCATTACTATGTGTC <b>AAGGGACACA</b> ATGCTTGGGGGCTCTGAAATATGGAGGGACATTGA  |
| mTyr-AAG-Mut9-60b  | GCATTACTATGTGTC <b>AAGGGACACAC</b> GGCTTGGGGGCTCTGAAATATGGAGGGACATTGA  |
| mTyr-AAG-Mut10-60b | GCATTACTATGTGTC <b>AAGGGACACACT</b> TCTTGGGGGCTCTGAAATATGGAGGGACATTGA  |
| mTyr-AAG-Mut11-60b | GCATTACTATGTGTC <b>AAGGGACACACTG</b> ATTGGGGGCTCTGAAATATGGAGGGACATTGA  |
| mTyr-AAG-Mut12-60b | GCATTACTATGTGTC <b>AAGGGACACACTGC</b> TGGGGGCTCTGAAATATGGAGGGACATTGA   |
| mTyr-AAG-Mut13-60b | GCATTACTATGTGTC <b>AAGGGACACACTGCT</b> GGGGGCTCTGAAATATGGAGGGACATTGA   |
| mTyr-AAG-Mut14-60b | GCATTACTATGTGTC <b>AAGGGACACACTGCTT</b> GGGGCTCTGAAATATGGAGGGACATTGA   |
| mTyr-AAG-Mut15-60b | GCATTACTATGTGTC <b>AAGGGACACACTGCTTGT</b> GGGCTCTGAAATATGGAGGGACATTGA  |
| mTyr-AAG-Mut16-60b | GCATTACTATGTGTC <b>AAGGGACACACTGCTTGG</b> TGGCTCTGAAATATGGAGGGACATTGA  |
| mTyr-AAG-Mut17-60b | GCATTACTATGTGTC <b>AAGGGACACACTGCTTGGGG</b> TGCTCTGAAATATGGAGGGACATTGA |
| mTyr-AAG-Mut18-60b | GCATTACTATGTGTC <b>AAGGGACACACTGCTTGGGG</b> TCTCTGAAATATGGAGGGACATTGA  |
| mTyr-AAG-Mut19-60b | GCATTACTATGTGTC <b>AAGGGACACACTGCTTGGGGG</b> ATCTGAAATATGGAGGGACATTGA  |
| mTyr-AAG-Mut20-60b | GCATTACTATGTGTC <b>AAGGGACACACTGCTTGGGGG</b> CGCTGAAATATGGAGGGACATTGA  |
| mTyr-AAG-Mut21-60b | GCATTACTATGTGTC <b>AAGGGACACACTGCTTGGGGG</b> CTATGAAATATGGAGGGACATTGA  |
| mTyr-AAG-Mut22-60b | GCATTACTATGTGTC <b>AAGGGACACACTGCTTGGGGG</b> CTCGAAATATGGAGGGACATTGA   |
| mTyr-AAG-Mut23-60b | GCATTACTATGTGTC <b>AAGGGACACACTGCTTGGGGG</b> CTCTTAAATATGGAGGGACATTGA  |
| mTyr-AAG-Mut24-60b | GCATTACTATGTGTC <b>AAGGGACACACTGCTTGGGGG</b> CTCTGCAATATGGAGGGACATTGA  |
| mTyr-AAG-Mut25-60b | GCATTACTATGTGTC <b>AAGGGACACACTGCTTGGGGG</b> CTCTGACATATGGAGGGACATTGA  |
| mTyr-AAG-Mut26-60b | GCATTACTATGTGTC <b>AAGGGACACACTGCTTGGGGG</b> CTCTGAACTATGGAGGGACATTGA  |
| mTyr-AAG-Mut27-60b | GCATTACTATGTGTC <b>AAGGGACACACTGCTTGGGGG</b> CTCTGAAAGATGGAGGGACATTGA  |
| mTyr-AAG-Mut28-60b | GCATTACTATGTGTC <b>AAGGGACACACTGCTTGGGGG</b> CTCTGAAATCTGGAGGGACATTGA  |
| mTyr-AAG-Mut29-60b | GCATTACTATGTGTC <b>AAGGGACACACTGCTTGGGGG</b> CTCTGAAATAGGGAGGGACATTGA  |
| mTyr-AAG-Mut30-60b | GCATTACTATGTGTC <b>AAGGGACACACTGCTTGGGGG</b> CTCTGAAATATGAGGGACATTGA   |
| mTyr-AAG-Mut31-60b | GCATTACTATGTGTC <b>AAGGGACACACTGCTTGGGGG</b> CTCTGAAATATGTAGGGACATTGA  |
| mTyr-AAG-Mut32-60b | GCATTACTATGTGTC <b>AAGGGACACACTGCTTGGGGG</b> CTCTGAAATATGGCGGGACATTGA  |
